# Supplementary material for: Early hyperoxia and 28-day mortality in patients on venoarterial ECMO support for refractory cardiogenic shock: a bicenter retrospective propensity score-weighted analysis
Source: PubMed Central journal article supplement (PMC9414410; doi:10.1186/s13054-022-04133-7), 2022-08-26

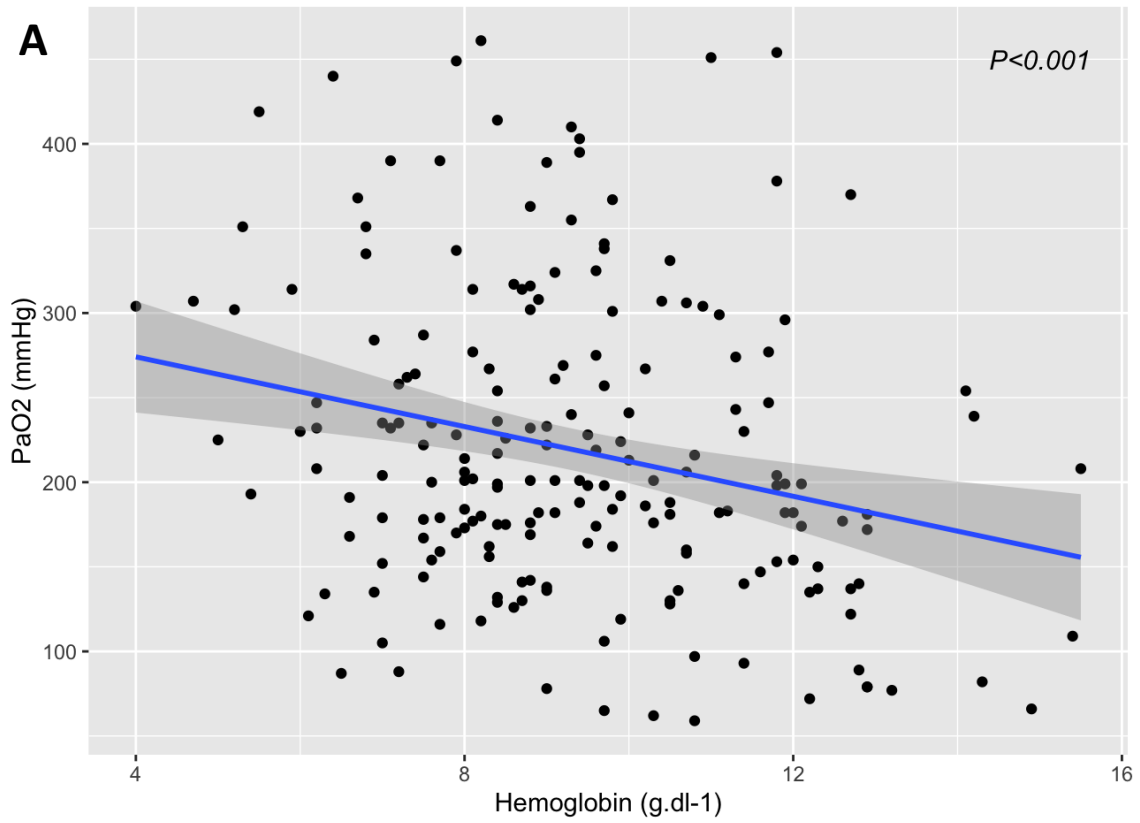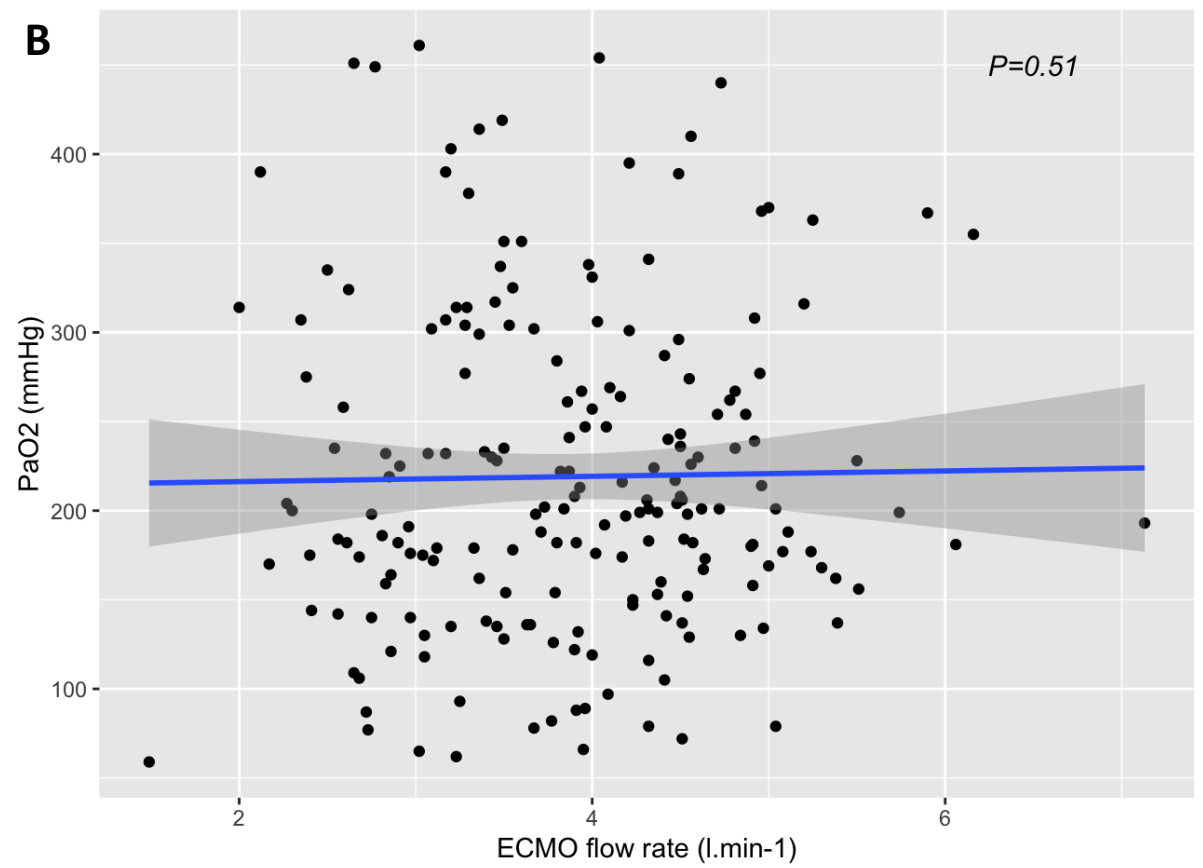

Supplement: 13054_2022_4133_MOESM1_ESM.pdf [file 13054_2022_4133_MOESM1_ESM.pdf]
