# Supplementary material for: Early hyperoxia and 28-day mortality in patients on venoarterial ECMO support for refractory cardiogenic shock: a bicenter retrospective propensity score-weighted analysis
Source: PubMed Central journal article supplement (PMC9414410; doi:10.1186/s13054-022-04133-7), 2022-08-26
Supplement: 13054_2022_4133_MOESM3_ESM.pdf [file 13054_2022_4133_MOESM3_ESM.pdf]

# 28-day survival curve

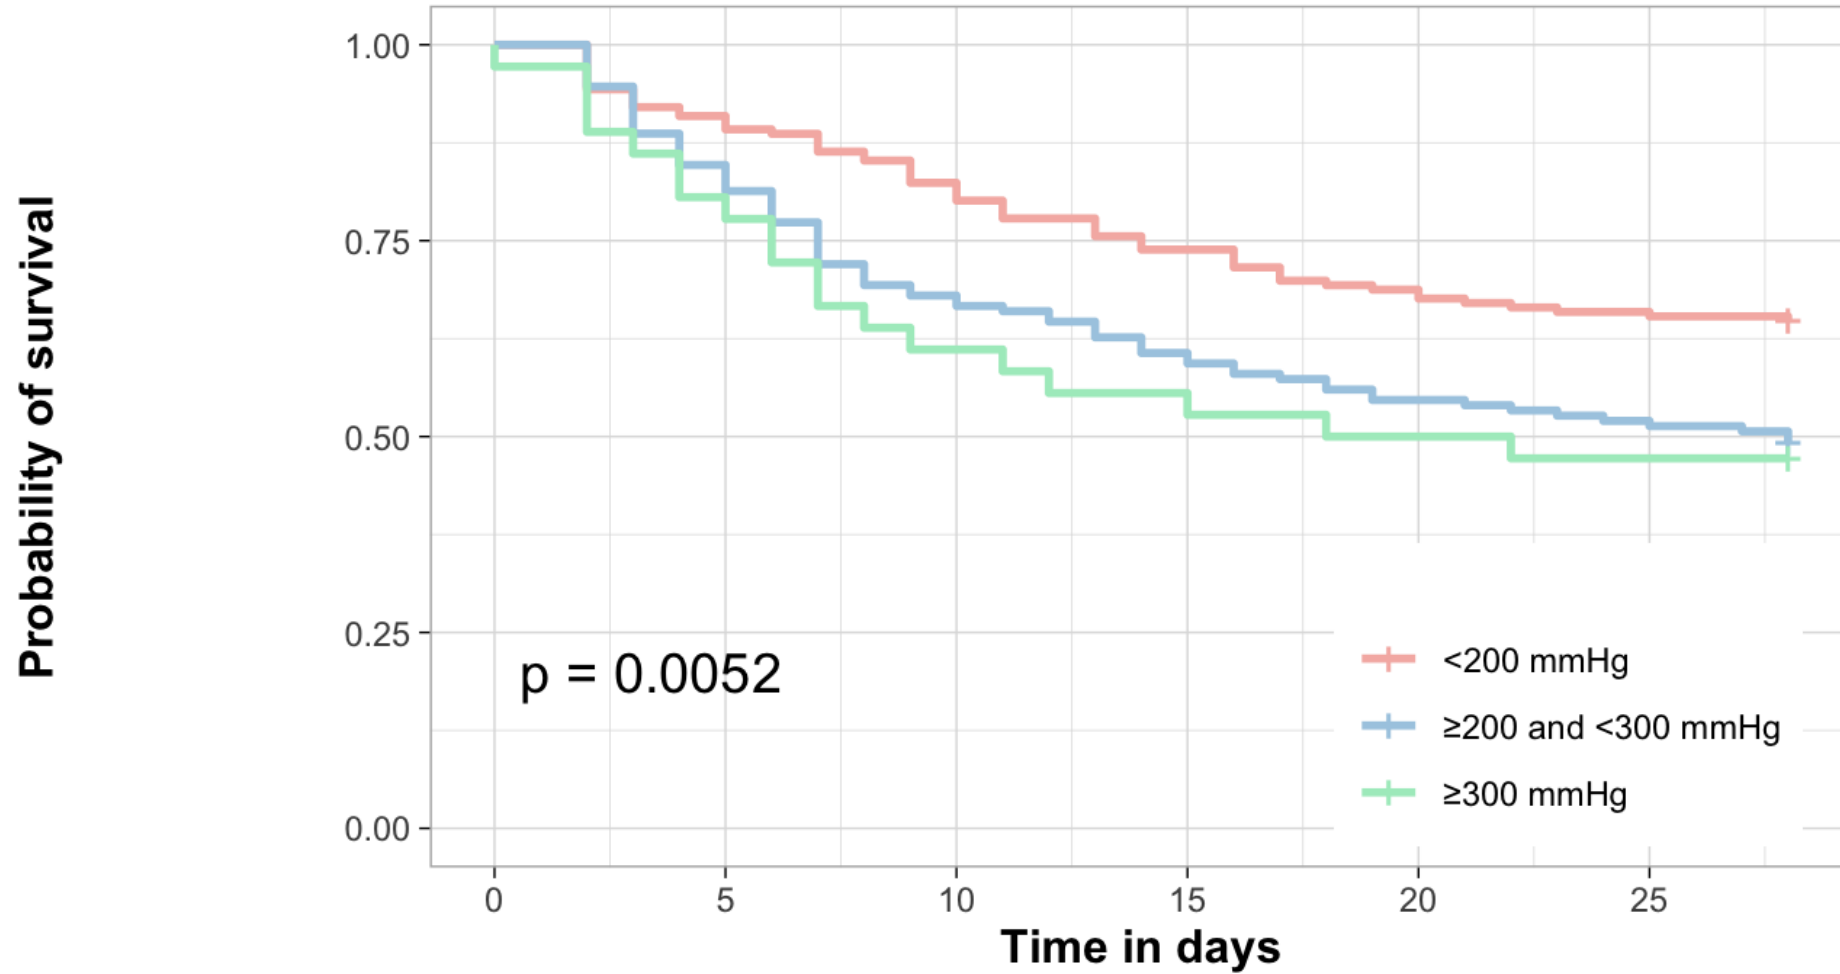

## Number at risk

|                    | 0   | 5   | 10  | 15  | 20  | 25  |
|--------------------|-----|-----|-----|-----|-----|-----|
| <200 mmHg          | 176 | 160 | 145 | 130 | 121 | 116 |
| ≥200 and <300 mmHg | 150 | 127 | 102 | 91  | 82  | 78  |
| ≥300 mmHg          | 36  | 29  | 22  | 20  | 18  | 17  |
